# Supplementary material for: Activation of cAMP Signaling in Response to α-Phellandrene Promotes Vascular Endothelial Growth Factor Levels and Proliferation in Human Dermal Papilla Cells
Source: MDPI journal article supplement (doi:10.3390/ijms23168959), 2022-08-11
Supplement: s1 [file s1]

**Table S1.** Primer sequences used for quantitative polymerase chain reaction (qPCR).

| Gene name                                                                   | Primer sequences (5'→ 3')                                      |
|-----------------------------------------------------------------------------|----------------------------------------------------------------|
| Bone morphogenetic protein 1 ( <i>BMP1</i> )                                | F: CAGTTTGACTTCTTTGAGACAGAGGGC<br>R: TGTGAGTCCACTGCGCACCTCCACG |
| Colony Stimulating factor 1( <i>CSF1</i> )                                  | F: ATGACAGACAGGTGGAAGTCCAG<br>R: TCACACAACCTCAGTAGGTTTCAGG     |
| Fibroblast growth factor 1 ( <i>FGF1</i> )                                  | F: ACCGAGAGGTTCAACCTGCC<br>R: GCCATAGTGAGTCCGAGGACC            |
| Fibroblast growth factor 11 ( <i>FGF11</i> )                                | F: GGCATCGTCACCAAAGTGT<br>R: GCAGTCCCTCAGCATTTCATG             |
| Glial cell derived neurotrophic factor ( <i>GDNF</i> )                      | F: CCCCAGCCATCCAGTCATTC<br>R: ATCGCACTGCCAAGGTTCTC             |
| Glucose-6-phosphate isomerase ( <i>GPI</i> )                                | F: AGGCTGCTGCCACATAAGGT<br>R: AGCGTCGTGAGAGGTCACCTG            |
| Heparin binding epidermal growth factor-like growth factor ( <i>HBEGF</i> ) | F: ATCGTGGGGCTTCTCATGTTT<br>R: TTAGTCATGCCCAACTTCACTTT         |
| Insulin-like growth factor 1 ( <i>IGF1</i> )                                | F: ATAGAGCCTGCGCAATGGAATAAAG<br>R: AGAAATCCAGAGAGATGGGAGATG    |
| Inhibin subunit beta A ( <i>INHBA</i> )                                     | F: ACACAACAACTTTTGCTGCC<br>R: TCGTGTCACCACTGTCTTCTC            |
| Notch ligand jagged-1 ( <i>JAG1</i> )                                       | F: TCGGGTCAGTTCGAGTTGGA<br>R: CGTTCACGTTCTGCATGGAC             |
| Midkine ( <i>MDK</i> )                                                      | F: CGCGGTCGCCAAAAAGAAAG<br>R: TACTTGCAGTCGGCTCCAAAC            |
| Nerve growth factor ( <i>NGF</i> )                                          | F: ATACAGGCGGAACCACTC<br>R: TGCTCCTGTGAGTCCTGTTG               |
| Neurotrophin 3 ( <i>NTF3</i> )                                              | F: CAGAACATCACGGCGGAAAC<br>R: ACAGACTCTCACTGTCACATACC          |
| Neuregulin 1 ( <i>NRG1</i> )                                                | F: CCGCAGCATCACTTCACACAAAG<br>R: AAGTGGATGGAACCACAGAAAGG       |
| Platelet derived growth factor C ( <i>PDGFC</i> )                           | F: CTCCTGGTTAAACGCTGTGG<br>R: TATCCTCCTGTGCTCCCTCT             |
| Secreted phosphoprotein 1 ( <i>SPP1</i> )                                   | F: TTCTGATTGGGACAGCCGTG<br>R: TCTCATCATTGGCTTTCCGCT            |
| Transforming growth factor beta 1 ( <i>TGFB1</i> )                          | F: AGCGACTCGCCAGAGTGTTA<br>R: GCAGTGTGTTATCCCTGCTGTCA          |
| Vascular endothelial growth factor ( <i>VEGF</i> )                          | F: CTTCTGAGTTGCCCAGGAGA<br>R: GGATGGAGGAAGGTCAACCA             |
| Glyceraldehyde 3-phosphate dehydrogenase ( <i>GAPDH</i> )                   | F: AAATCAAGTGGGGCGATGC<br>R: AGGGGGCAGAGATGATGACC              |

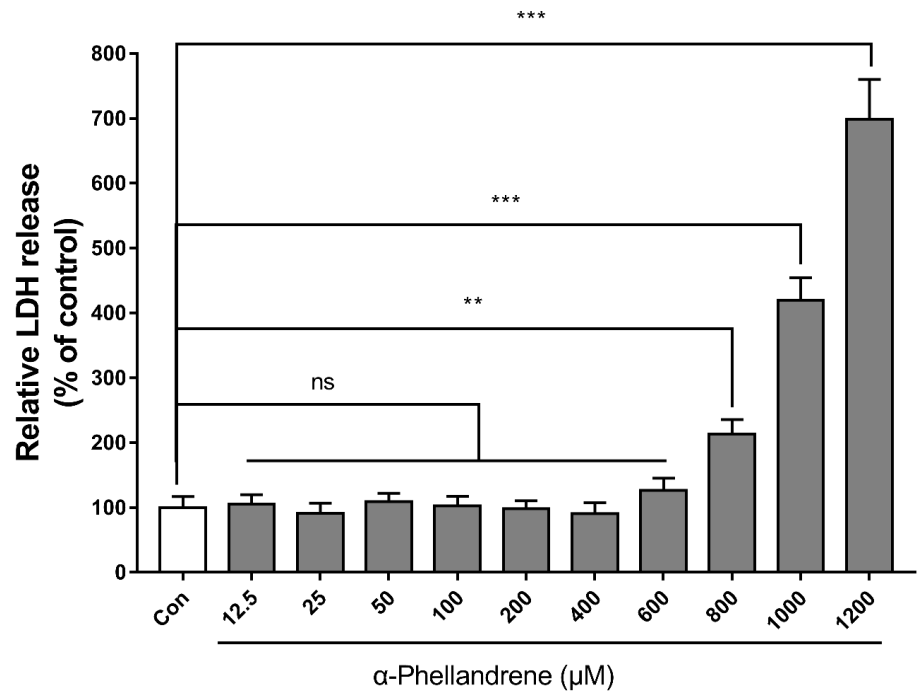

**Figure S1.**  $\alpha$ -phellandrene up to 600  $\mu$ M does not induce cytotoxicity in dermal papilla cells (DPCs). DPCs were cultured for 72 h with vehicle (dimethyl sulfoxide; DMSO) as a control (Con), or various concentrations of  $\alpha$ -phellandrene (12.5-1,200  $\mu$ M). The cell death in response to  $\alpha$ -phellandrene treatment was analyzed by lactate dehydrogenase (LDH) assay. Results are shown as mean  $\pm$  standard error of the mean (SEM) of three independent experiments. Statistically significant differences are marked as \*\*  $p < 0.01$  and \*\*\*  $p < 0.001$  vs control (Con).
